# Supplementary material for: Factors affecting livestock depredation by snow leopards (Panthera uncia) in the Himalayan region of Nepal
Source: PeerJ. 2021 Jun 16;9:e11575. doi: 10.7717/peerj.11575 (PMC8214393; doi:10.7717/peerj.11575)
Supplement: Supplemental Information 1 — Detailed data on attack sites, livestock shed and floral and faunal presence in the study area. [file peerj-09-11575-s001.xlsx]

## Sheet: Sheet1
Livestock sheds of study area
S.N.	Name of place	Name of animal	Longitude	Latitude
1	KyuchiKharka	Yak	241235	3163229
2	Dada Kharka	Yak	241686	3164002
3	KyuchiKharka	Yak	241505	3163841
4	KyuchiKharka	Yak	241188	3163290
5	KyuchiKharka	Yak	242037	3164495
6	KyuchiKharka	Yak	242084	3164541
7	SurkiDudhKhola	Cow	247610	3165269
8	SurkiDudhKhola	Cow	247833	3165474
9	SurkiDudhKhola	Cow	247675	3165340
10	Surki Bazar	Cow	247215	3164875
11	SurkiKharka	Cow	247540	3165030
12	ChauriKharka	Goat	250424	3166034
13	Habu	Goat	252212	3168289
14	Habu	Sheep	252192	3168454
15	Habu	Sheep	252199	3168621
16	Goba	Sheep/Goat	247113	3163774
17	Chwonli	Cow	248657	3166056
18	ChauriKharka	Cow	250448	3166076
19	ChauriKharka	Sheep	250704	3166085
20	HabuKharka	Cow	252226	3168262
21	Bhimtang	Yak	253002	3169656
22	BhimtangKharka	Sheep/Goat	252689	3170395
23	BhimtangKharka	Sheep/Cow	252501	3171011
24	Punkar Tal	Cow	253024	3173904
25	Punkar Tal	Horse/Cow	253048	3173938
26	Guwapari	Cow	247022	3163787
27	Guwapari	Sheep/Cow	247043	3164078
28	Guwapari	Sheep	247062	3164073
29	TiuchiNache	Cow	242667	3156846
30	Dona Nache	Goat	248328	3158356
31	KyuwaKharka	Cow	249306	3158312
32	KyuwaKharka	Goat	249318	3158293
33	Dharamsala	Yak	251355	3157672
34	KharkaOdar	Goat	250409	3158188
35	Nache CF	Cow	243844	3155978
36	Nache CF	Cow	242769	3156907
37	NacheKharka	Sheep/Goat	248272	3158327
38	NacheKharka	Cow	249289	3158313
39	Yak Kharka	Yak	251301	3157610
40	Yak Kharka	Horse	251212	3157238
41	Yak Kharka	Yak	252760	3156591
42	Yak Kharka	Goat	252519	3156586
43	Nache CF	Cow	244560	3156558
44	Nache CF	Cow	243708	3155616
45	Nache CF	Cow	243253	3155828
Other important animals and plant species in the study area
S.N.	Presence of important species	Type of sign	Longitude	Latitude
1	Snow leopard	foot print	241305	3162074
2	Snow leopard	Scat	241305	3162250
3	Panchaule	plant	241509	3162728
4	Musk deer	foot print	241039	3163149
5	Musk deer	group sighted	240921	3163071
6	Ban Lasun	plant	241168	3163290
7	Panchaule	plant	241994	3164270
8	Snow leopard	foot print	242025	3164396
9	Pakhanbed	plant	250638	3157895
10	Snow leopard	foot print	251155	3157348
11	Danphe	feather	251253	3157331
12	Snow leopard	scat	252760	3156597
13	Snow leopard	foot print	252326	3156951
14	Panchaule	plant	253115	3156361
15	Snow leopard	foot print	253260	3156254
16	GuchhiChyau	plant	253489	3156029
17	Snow leopard	Scat	253213	3155351
18	Snow leopard	foot print	253717	3154746
19	Snow leopard	hair	253952	3154457
20	Snow leopard	Scat	250323	3158339
21	Satuwa	plant	245228	3157211
22	Goral	bone	244542	3157112
23	Common leopard	foot print	249745	3158144
24	Common leopard	Scat	251548	3157648
25	Ban Lasun	plant	251548	3157648
26	Common leopard	foot print	251291	3157778
27	Kutki	plant	251523	3157709
28	Ban Lasun	plant	253080	3156400
29	GuchhiChyau	plant	252892	3155645
30	Snow leopard	Scat	252830	3156717
31	Kutki	plant	252073	3157070
32	Nirmansi	plant	244025	3156127
Snow leopard attack zone in the study area
SN	Place	Latitude	Longitude	Attack	Dead	Injured	Remark
1	Kyuchi Kharka	241280	3163265	Sheep	0	2
2	Kyuchi Kharka	241355	3163103	Yak	1
3	Kyuchi Kharka	241437	3163445	Animal's Part	1
4	Dadakharka	241212	3163428				Leopard Sight
5	Khobro	241223	3162980	Sheep	2
6	Khobro	241266	3162887	Goat	1	2
7	Khobro kharka	241299	3162749	Horse	1
8	khobro	241336	3162561	Sheep	1
9	Yoba kharka	241190	3162282	Horse	2
10	Yoba	241250	3162024	Sheep	1	1
11	Yoba Dada	241313	3162076	Horse	5
12	Khobro Pakha	241350	3162438	Yak		1
13	Khobro Tumka	241429	3162484	Horse	1
14	Khobro pahiro	241494	3162577	Goat	1
15	Khobro khakhar	241507	3162696	Sheep	1	1
16	Khobro cho	241447	3162911	Yak	1
17	Dadakharka	241749	3164087	Horse	1	2
18	Chauri goth	241836	3164175	Yak	2	1
19	Chauri goth	242000	3164286	Sheep	2	1
20	Syaule kharka	241953	3164376	Yak	1	1
21	Syaule kharka	241956	3164438	Yak	1	1
22	chhangle Khark	241995	3164495	Yak	1	1
23	chhangle Khark	242138	3164598	Horse	1
24	chhangle Khark	242607	3164862	Yak	2	1
25	Kharka	242503	3164786	Yak	1
26	Surki Dudhkhola	247766	3165456				Charibagh
27	Surki khola	247705	3165711	Horse	1
28	Yak kharka	248246	3165956	Sheep	1
29	Surki	247238	3164829	Horse	1
30	Surki	247245	3164900	Cow	2		Animal parts
31	Surki	247271	3164958	Horse	1
32	Surki Kharka	247290	3164994	Cow	6		Animals Parts
33	Surki khola	247522	3165153	Cow	2
34	Surki Kharka	247654	3165037	Horse	1
35	Surki Kharka	247813	3165348	Horse	1
36	Chauri kharka	250502	3166029	Horse	4
37	Pul bhim tang	252827	3169103	Horse	1
38	Kyuchi Kharka	241188	3163179	Horse	1
39	kyuchi Phedi	241117	3163162	Yak		1
40	kyuchi Phedi	241069	3163158	Yak		2
41	kyuchi Phedi	241042	3163150	Goat	2
42	Kyuchi Kharka	240988	3163114	Horse		1
43	Dadakharka	240940	3163076	Goat	1
44	Dadakharka	240921	3163071	Horse	1
45	Dadakharka	240868	3162997	Yak	6		Animals Parts
46	Khopro	241220	3163072	Sheep	5
47	Khopro	241251	3163038	Sheep	2
48	khopro kharka	241243	3163105	Jharal	1
49	Kyuchi Kharka	241377	3163215	Yak	1	2	Animals Parts
50	Kyuchi Kharka	241482	3163210		2		Animals Parts
51	Kyuchi Kharka	241548	3163265	Yak	2		Animals Parts
52	Kyuchi Kharka	241609	3163414	Sheep	2
53	Kyuchi Kharka	241692	3163845	Yak	1
54	Kyuchi Kharka	241686	3164002	Yak	1
55	Kyuchi Kharka	241531	3163863	Horse	3
56	Syonle kharka	241881	3164136	Thar	1
57	Syonle kharka	241965	3164231	Sheep	1
58	Syonle kharka	242027	3164373	Yak	5		Animals parts
59	Chanle kharka	242084	3164541	Yak		1
60	Chanle kharka	242381	3164632	Gharl	1
61	Chanle kharka	242541	3164670	Thar	2		Animals parts
62	Kyujiged	240980	3162805	Horse	1
63	Tiuri Nache	242667	3156846	Cow		1
64	Nache	245684	3157748	Goat	1
65	Dona khola	248016	3158284	Goat	1
66	Nache bakhara	248328	3158356	Goat		2
67	Nache bakhara	248638	3158382	Horse	1
68	Kyuwa kharka	249385	3158364	Goat	2
69	Kyuwa kharka	249343	3158343	Cow	2
70	Dona kharka	251365	3157608	Yak	2
71	Dona odar	251471	3157744	Yak	1
72	Dona yak kharka	251430	3157793	Horse	1
73	Yak kharka	252870	3155046	Yak	1
74	Dona yak kharka	253360	3156143	Yak	2
75	Yak kharka	253080	3156400	Yak		1
76	Dona lak	253479	3155822	Yak	2
77	Dona yak kharka	253106	3154683	Yak	1
78	Dharamsala Dona	252882	3154814	Goat	2
79	Dona lak yak	253616	3155969	Yak	1
80	Dharamsal odar	253173	3155512	Goat	1
81	Dona yak kharka	252832	3155408	Yak		2
82	Dona yak kharka	252846	3156585	Yak	1
83	Yak kharka charen	252682	3156728	Yak	1
84	Kharka ordar	250409	3158188	Goat		3
85	Kharka ordar	250527	3158183	Goat	3
86	Nache	245387	3157757	Goat	2
87	Nache kharka	248272	3158327	Goat		4
88	Nache kharka	248092	3158337	Sheep	1
89	Nache kharka	249289	3158313	Cow		2
90	Nache kharka	248458	3158330	Buffalo		2
91	Yak kharka	251301	3157610	Yak		3
92	Yak kharka	251271	3157510	Yak	1
93	Yak kharka	251191	3157448	Cow	1
94	Yak kharka	251212	3157238	Horse		2
95	Yak kharka	251249	3157146	Yak	2
96	Yak kharka	251342	3157297	Cow	1	2
97	Yak kharka	252569	3156747	Yak	1
98	Yak kharka	252882	3156467	Yak	2
14	Dona Lek	253248	3155783	Yak	2	1
15	Dona Lek	253611	3155827	Yak		2
16	Dona Lek	253334	3155855	Yak	1
17	Dona Lek	253367	3155051	Yak	1
18	Dona Lek	253483	3154991	Yak	1
19	Dona Lek	253568	3154890	Yak	1
20	Dona Lek	253634	3154815	Yak	1
21	Dona Lek	253696	3154651	Yak	2
22	Dona Lek	253869	3154549	Yak	1
108	Yak kharka	252290	3156934	Goat	1
109	Omu Odar	250349	3158272	Goat	2
